# Supplementary material for: Exploring the prevalence of childhood adversity among university students in the United Kingdom: A systematic review and meta-analysis
Source: PubMed Central journal article supplement (PMC11356454; doi:10.1371/journal.pone.0308038), 2024-08-28
Supplement: pone.0308038.s001.pdf [file pone.0308038.s001.pdf]

| Search terms                                                                                                                                               |                                                                                        |                                                                                                                                                                                                                    | Number of Results from Database |        |      |     |      |             |
|------------------------------------------------------------------------------------------------------------------------------------------------------------|----------------------------------------------------------------------------------------|--------------------------------------------------------------------------------------------------------------------------------------------------------------------------------------------------------------------|---------------------------------|--------|------|-----|------|-------------|
|                                                                                                                                                            |                                                                                        |                                                                                                                                                                                                                    | Filters applied:                |        |      |     |      |             |
|                                                                                                                                                            |                                                                                        |                                                                                                                                                                                                                    | - peer-reviewed journal         |        |      |     |      |             |
|                                                                                                                                                            |                                                                                        |                                                                                                                                                                                                                    | - English language              |        |      |     |      |             |
|                                                                                                                                                            |                                                                                        |                                                                                                                                                                                                                    | - Published between 2000-2024   |        |      |     |      |             |
| Primary search term (title, abstract, key words)                                                                                                           | AND (title, abstract, key words)                                                       | AND (title, abstract, key words OR author affiliation/ location identifier)                                                                                                                                        | Psyc INFO                       | Pubmed | ERIC | BEI | AMED | CINAHL      |
| trauma*<br>OR<br>abus*<br>OR<br>maltreat*<br>OR<br>advers*<br>OR<br>neglect*<br>OR<br>ptsd<br>OR<br>post?traumatic stress<br>OR<br>distress*<br>OR<br>ACE* | universit*<br>OR<br>student*<br>OR<br>graduate*<br>OR<br>undergrad*<br>OR<br>postgrad* | united kingdom<br>OR<br>uk<br>OR<br>Britain<br>OR<br>british<br>OR<br>england<br>OR<br>scotland<br>OR<br>wales<br>OR<br>northern Ireland<br>OR<br>English<br>OR<br>Scottish<br>OR<br>Welsh<br>OR<br>Northern Irish | 2042                            | 1985   | 1158 | 181 | 22   | 988         |
| Checked bibliography of related reviews and found relevant papers                                                                                          |                                                                                        |                                                                                                                                                                                                                    |                                 |        |      |     |      | 2           |
| <b>Total</b>                                                                                                                                               |                                                                                        |                                                                                                                                                                                                                    |                                 |        |      |     |      | <b>6378</b> |
