# Supplementary material for: Exploring the prevalence of childhood adversity among university students in the United Kingdom: A systematic review and meta-analysis
Source: PubMed Central journal article supplement (PMC11356454; doi:10.1371/journal.pone.0308038), 2024-08-28
Supplement: pone.0308038.s002.pdf [file pone.0308038.s002.pdf]

**Table A. Risk of bias tool**

| Criteria                                                                                                                    | Quality Rating                                                                                           |                                                                                                                                                                                                                        |                                                                                                                                                                                                                       |                                                                                                                                                                                                                                                                                      |
|-----------------------------------------------------------------------------------------------------------------------------|----------------------------------------------------------------------------------------------------------|------------------------------------------------------------------------------------------------------------------------------------------------------------------------------------------------------------------------|-----------------------------------------------------------------------------------------------------------------------------------------------------------------------------------------------------------------------|--------------------------------------------------------------------------------------------------------------------------------------------------------------------------------------------------------------------------------------------------------------------------------------|
|                                                                                                                             | 0<br>Unclear<br><b>(red)</b>                                                                             | 0<br>Poor<br><b>(yellow)</b>                                                                                                                                                                                           | 1<br>Adequate<br><b>(amber)</b>                                                                                                                                                                                       | 2<br>Good<br><b>(green)</b>                                                                                                                                                                                                                                                          |
| <b>Sample</b>                                                                                                               | Sample is described but details are unclear                                                              | <p>Sample not specified</p> <p><b>AND/OR</b></p> <p>Mean age <b>and</b> sex of sample not specified</p>                                                                                                                | <p>Single restricted or non-random sample e.g., psychology students only</p> <p><b>AND/OR</b></p> <p>Single regional sample e.g., one UK university</p> <p><b>AND</b></p> <p>Mean age <b>AND/OR</b> sex specified</p> | <p>Multiple restricted or non-random samples e.g., students from a range of disciplines /overall university sample</p> <p><b>AND/OR</b></p> <p>Multiple regions non-random sampling e.g., more than one UK university</p> <p><b>AND</b></p> <p>Mean age <b>AND</b> sex specified</p> |
| <b>Clarity/consistency of definition of adverse experience with current definitions (according to assessment tool used)</b> | Lack of information available/unclear regarding how the assessment tool defines the adverse experience   | The definition provided by the assessment tool has <b>large</b> discrepancies (e.g. markedly different age range specified) between the tools definition and the definition accepted in the current review (see below) | The definition provided by the assessment tool has <b>some</b> differences compared to the definition accepted in the current review, but largely aligns with the definition (see below)                              | Definition aligns well with the definition accepted in the current review (see below)                                                                                                                                                                                                |
| <b>Quality of adversity assessment tool</b>                                                                                 | Lack of information available/unclear regarding the assessment tool used and its psychometric properties | No psychometric properties of assessment tool reported                                                                                                                                                                 | Psychometric properties of assessment tool reported in                                                                                                                                                                | Psychometric properties of assessment tool reported in                                                                                                                                                                                                                               |

---

**AND/OR**

A standardised assessment tool has not been used

**AND/OR**

Assessment tool has not previously been validated against another measure which assesses the specified adverse experience (e.g. sexual abuse) **OR** has found not to be valid/reliable.

current paper and are acceptable

**AND/OR**

Assessment tool has previously been validated against another measure which assesses the specified adverse experience (e.g. sexual abuse) **AND** has been found to be acceptably valid and reliable.

current paper and are acceptable

**AND**

Assessment tool has previously been validated against a 'Gold Standard' measure or 'Clinical Interview' which assesses the specified adverse experience (e.g. sexual abuse) **AND** has been found to be acceptably valid and reliable.

---

**Table B. Accepted Definitions of Adverse Childhood Experiences**

| <b>Type of adversity</b>                                     | <b>Accepted definition</b>                                                                                                                                                                                                                                                                                                                                                                          |
|--------------------------------------------------------------|-----------------------------------------------------------------------------------------------------------------------------------------------------------------------------------------------------------------------------------------------------------------------------------------------------------------------------------------------------------------------------------------------------|
| Childhood adversity                                          | <b>Childhood adversity</b> refers to a wide range of circumstances or events which may pose a serious threat to a child’s physical or psychological well-being. Examples include child abuse and neglect, household dysfunction, bullying, serious accidents, discrimination, extreme poverty, and community violence (Bartless & Sacks, 2019) usually occurring within the first 18 years of life. |
| <b>Childhood Abuse (within first 18 years of life)</b>       |                                                                                                                                                                                                                                                                                                                                                                                                     |
| Sexual abuse                                                 | Child sexual abuse is when a child is forced or enticed to take part in sexual activities. These activities may involve physical contact or non-contact activities, and they can happen online or offline (Department for Education [DFE], 2018).                                                                                                                                                   |
| Physical abuse                                               | Physical abuse is any way of deliberately hurting a child which causes them physical harm (NSPCC, 2020).                                                                                                                                                                                                                                                                                            |
| Emotional abuse                                              | Emotional abuse involves the ongoing emotional maltreatment of a child (DFE, 2018). It may sometimes be called psychological abuse.                                                                                                                                                                                                                                                                 |
| <b>Neglect (within first 18 years of life)</b>               |                                                                                                                                                                                                                                                                                                                                                                                                     |
| Physical neglect                                             | Involves a parent or carer failing to take care of the child’s basic physical needs, including providing shelter, food, and clothing (DFE, 2018).                                                                                                                                                                                                                                                   |
| Emotional neglect                                            | Involves a parent or carer failing to take care of the child’s basic psychological/emotional needs, and protecting them from emotional harm (DFE, 2018).                                                                                                                                                                                                                                            |
| <b>Household dysfunction (within first 18 years of life)</b> |                                                                                                                                                                                                                                                                                                                                                                                                     |
| Parental separation                                          | Parents divorcing or separating during childhood, regardless of the reason for separation (Petersen et al., 2016).                                                                                                                                                                                                                                                                                  |
| Domestic violence                                            | Witnessing domestic violence (slap, hit, kick, punch, or beat each other up) from parents/carers during childhood (Felitti et al., 1998).                                                                                                                                                                                                                                                           |
| Mental health problem                                        | Lived with anyone who experienced mental health difficulties and/or suicidal thoughts or behaviours during childhood (Felitti et al., 1998).                                                                                                                                                                                                                                                        |
| Substance abuse                                              | Involves living in a household where adults were experiencing alcohol and/or drug use problems during childhood (Felitti et al., 1998).                                                                                                                                                                                                                                                             |
| Incarceration                                                | Lived with anyone who served time in prison (or was sentenced to serve time in prison) during childhood (Felitti et al., 1998).                                                                                                                                                                                                                                                                     |
