# Supplementary material for: Exploring the prevalence of childhood adversity among university students in the United Kingdom: A systematic review and meta-analysis
Source: PubMed Central journal article supplement (PMC11356454; doi:10.1371/journal.pone.0308038), 2024-08-28
Supplement: pone.0308038.s003.pdf [file pone.0308038.s003.pdf]

| Author, Year of publication       | Risk of bias criteria        |            |       |       |                               |            |       |       |                  |            |        |       |
|-----------------------------------|------------------------------|------------|-------|-------|-------------------------------|------------|-------|-------|------------------|------------|--------|-------|
|                                   | 1 or more adverse experience |            |       |       | 3 or more adverse experiences |            |       |       | Sexual abuse     |            |        |       |
|                                   | Sample                       | Definition | Tool  | Score | Sample                        | Definition | Tool  | Score | Sample           | Definition | Tool   | Score |
| Davies, Read & Shevlin, 2022      | Amber                        | Green      | Amber | 0.67  | Amber                         | Green      | Amber | 0.67  | Amber            | Amber      | Amber  | 0.50  |
| Gracie et al., 2007               | -                            | -          | -     | -     | -                             | -          | -     | -     | -                | -          | -      | -     |
| Ireland, Alderson & Ireland, 2015 | -                            | -          | -     | -     | -                             | -          | -     | -     | Amber            | Green      | Yellow | 0.5   |
| Lagdon et al., 2021*              | Amber                        | Yellow     | Amber | 0.17  | Amber                         | Yellow     | Amber | 0.17  | Amber            | Yellow     | Yellow | 0.17  |
| Martin-Denham & Donaghue, 2022    | Amber                        | Green      | Amber | 0.67  | Amber                         | Green      | Amber | 0.67  | Amber            | Amber      | Amber  | 0.50  |
| McGavock & Spratt, 2017           | Amber                        | Green      | Amber | 0.67  | Amber                         | Green      | Amber | 0.67  | Amber            | Amber      | Amber  | 0.50  |
| Moulton et al., 2015              | -                            | -          | -     | -     | -                             | -          | -     | -     | Amber            | Amber      | Amber  | 0.50  |
| O'Neil et al., 2018               | -                            | -          | -     | -     | -                             | -          | -     | -     | Amber            | Amber      | Amber  | 0.50  |
| Oaksford & Frude, 2001            | -                            | -          | -     | -     | -                             | -          | -     | -     | Amber            | Amber      | Red    | 0.33  |
| Worsley et al., 2018              | Amber                        | Green      | Amber | 0.67  | -                             | -          | -     | -     | Amber            | Amber      | Amber  | 0.50  |
| Author, Year of publication       | Physical abuse               |            |       |       | Emotional abuse               |            |       |       | Physical neglect |            |        |       |
| Author, Year of publication       | Sample                       | Definition | Tool  | Score | Sample                        | Definition | Tool  | Score | Sample           | Definition | Tool   | Score |
| Davies, Read & Shevlin, 2022      | -                            | -          | -     | -     | Amber                         | Green      | Amber | 0.67  | Amber            | Green      | Amber  | 0.67  |
| Gracie et al., 2007               | Amber                        | Green      | Amber | 0.67  | Amber                         | Green      | Amber | 0.67  | Amber            | Green      | Amber  | 0.67  |
| Ireland, Alderson & Ireland, 2015 | -                            | -          | -     | -     | -                             | -          | -     | -     | -                | -          | -      | -     |
| Lagdon et al., 2021               | Amber                        | Yellow     | Amber | 0.17  | Amber                         | Yellow     | Amber | 0.17  | -                | -          | -      | -     |
| Martin-Denham & Donaghue, 2022    | Amber                        | Green      | Amber | 0.67  | Amber                         | Green      | Amber | 0.67  | Amber            | Green      | Amber  | 0.67  |
| McGavock & Spratt, 2017           | Amber                        | Green      | Amber | 0.67  | Amber                         | Green      | Amber | 0.67  | Amber            | Green      | Amber  | 0.67  |
| Moulton et al., 2015              | Amber                        | Green      | Amber | 0.67  | Amber                         | Green      | Amber | 0.67  | Amber            | Green      | Amber  | 0.67  |
| O'Neil et al., 2018               | Amber                        | Green      | Amber | 0.67  | Amber                         | Green      | Amber | 0.67  | -                | -          | -      | -     |
| Oaksford & Frude, 2001            | -                            | -          | -     | -     | -                             | -          | -     | -     | -                | -          | -      | -     |
| Worsley et al., 2018              | Amber                        | Green      | Amber | 0.67  | Amber                         | Green      | Amber | 0.67  | Amber            | Green      | Amber  | 0.67  |

Note. Key for criteria scoring; Red = unclear (0); Yellow = poor (0); Amber = adequate (1); Green = good (2). \* Looked at adversity under 12 years old only.

| Author, Year of publication       | Risk of bias criteria |            |       |       |                     |            |       |       |                   |            |       |       |
|-----------------------------------|-----------------------|------------|-------|-------|---------------------|------------|-------|-------|-------------------|------------|-------|-------|
|                                   | Emotional neglect     |            |       |       | Parental separation |            |       |       | Domestic violence |            |       |       |
|                                   | Sample                | Definition | Tool  | Score | Sample              | Definition | Tool  | Score | Sample            | Definition | Tool  | Score |
| Davies, Read & Shevlin, 2022      | Amber                 | Green      | Amber | 0.67  | Amber               | Green      | Amber | 0.67  | Amber             | Green      | Amber | 0.67  |
| Gracie et al., 2007               | -                     | -          | -     | -     | -                   | -          | -     | -     | Amber             | Green      | Amber | 0.67  |
| Ireland, Alderson & Ireland, 2015 | -                     | -          | -     | -     | -                   | -          | -     | -     | -                 | -          | -     | -     |
| Lagdon et al., 2021               | -                     | -          | -     | -     | -                   | -          | -     | -     | -                 | -          | -     | -     |
| Martin-Denham & Donaghue, 2022    | Amber                 | Green      | Amber | 0.67  | Amber               | Green      | Amber | 0.67  | Amber             | Green      | Amber | 0.67  |
| McGavock & Spratt, 2017           | Amber                 | Green      | Amber | 0.67  | Amber               | Green      | Amber | 0.67  | Amber             | Green      | Amber | 0.67  |
| Moulton et al., 2015              | Amber                 | Green      | Amber | 0.67  | -                   | -          | -     | -     | -                 | -          | -     | -     |
| O'Neil et al., 2018               | -                     | -          | -     | -     | -                   | -          | -     | -     | Amber             | Green      | Amber | 0.67  |
| Oaksford & Frude, 2001            | -                     | -          | -     | -     | -                   | -          | -     | -     | -                 | -          | -     | -     |
| Worsley et al., 2018              | Amber                 | Green      | Amber | 0.67  | -                   | -          | -     | -     | -                 | -          | -     | -     |
| Author, Year of publication       | Mental health problem |            |       |       | Substance use       |            |       |       | Incarceration     |            |       |       |
| Author, Year of publication       | Sample                | Definition | Tool  | Score | Sample              | Definition | Tool  | Score | Sample            | Definition | Tool  | Score |
| Davies, Read & Shevlin, 2022      | Amber                 | Green      | Amber | 0.67  | Amber               | Green      | Amber | 0.67  | Amber             | Green      | Amber | 0.67  |
| Gracie et al., 2007               | -                     | -          | -     | -     | -                   | -          | -     | -     | -                 | -          | -     | -     |
| Ireland, Alderson & Ireland, 2015 | -                     | -          | -     | -     | -                   | -          | -     | -     | -                 | -          | -     | -     |
| Lagdon et al., 2021               | -                     | -          | -     | -     | -                   | -          | -     | -     | -                 | -          | -     | -     |
| Martin-Denham & Donaghue, 2022    | Amber                 | Green      | Amber | 0.67  | Amber               | Green      | Amber | 0.67  | Amber             | Green      | Amber | 0.67  |
| McGavock & Spratt, 2017           | Amber                 | Green      | Amber | 0.67  | Amber               | Green      | Amber | 0.67  | Amber             | Green      | Amber | 0.67  |
| Moulton et al., 2015              | -                     | -          | -     | -     | -                   | -          | -     | -     | -                 | -          | -     | -     |
| O'Neil et al., 2018               | Amber                 | Yellow     | Red   | 0.17  | Amber               | Yellow     | Red   | 0.17  | -                 | -          | -     | -     |
| Oaksford & Frude, 2001            | -                     | -          | -     | -     | -                   | -          | -     | -     | -                 | -          | -     | -     |
| Worsley et al., 2018              | -                     | -          | -     | -     | -                   | -          | -     | -     | -                 | -          | -     | -     |

Note. Key for criteria scoring; Red = unclear (0); Yellow = poor (0); Amber = adequate (1); Green = good (2).
