# Supplementary material for: Exploring the prevalence of childhood adversity among university students in the United Kingdom: A systematic review and meta-analysis
Source: PubMed Central journal article supplement (PMC11356454; doi:10.1371/journal.pone.0308038), 2024-08-28
Supplement: pone.0308038.s004.pdf [file pone.0308038.s004.pdf]

## One or More ACE

|                                                | PR     | 95%-CI           | p-value  | tau <sup>2</sup> | tau    | I <sup>2</sup> |
|------------------------------------------------|--------|------------------|----------|------------------|--------|----------------|
| Omitting Davies, Read & Shevlin                | 0.4937 | [0.2839; 0.7034] | < 0.0001 | 0.0454           | 0.2130 | 99.2%          |
| Omitting Lagdon et al.                         | 0.6272 | [0.3785; 0.8759] | < 0.0001 | 0.0640           | 0.2530 | 99.5%          |
| Omitting Martin-Denham & Donaghue              | 0.4831 | [0.2302; 0.7360] | 0.0002   | 0.0663           | 0.2575 | 99.6%          |
| Omitting McGavock & Spratt                     | 0.5523 | [0.2565; 0.8481] | 0.0003   | 0.0907           | 0.3012 | 99.7%          |
| Omitting Worsley, McIntyre, Bentall & Corcoran | 0.6131 | [0.3497; 0.8765] | < 0.0001 | 0.0718           | 0.2680 | 99.5%          |

## Three or More ACEs

|                                   | PR     | 95%-CI            | p-value | tau <sup>2</sup> | tau    | I <sup>2</sup> |
|-----------------------------------|--------|-------------------|---------|------------------|--------|----------------|
| Omitting Davies, Read & Shevlin   | 0.2496 | [0.0553; 0.4438]  | 0.0118  | 0.0289           | 0.1699 | 99.2%          |
| Omitting Lagdon et al.            | 0.4114 | [0.1854; 0.6373]  | 0.0004  | 0.0392           | 0.1979 | 98.9%          |
| Omitting Martin-Denham & Donaghue | 0.2497 | [-0.0195; 0.5189] | 0.0691  | 0.0564           | 0.2375 | 99.7%          |
| Omitting McGavock & Spratt        | 0.3516 | [-0.0265; 0.7297] | 0.0684  | 0.1110           | 0.3332 | 99.7%          |

## Physical Abuse

|                                   | PR     | 95%-CI           | p-value  | tau <sup>2</sup> | tau    | I <sup>2</sup> |
|-----------------------------------|--------|------------------|----------|------------------|--------|----------------|
| Omitting Gracie et al.            | 0.1658 | [0.0606; 0.2710] | 0.0020   | 0.0168           | 0.1297 | 95.4%          |
| Omitting Lagdon et al.            | 0.1575 | [0.0510; 0.2639] | 0.0037   | 0.0172           | 0.1311 | 94.6%          |
| Omitting Martin-Denham & Donaghue | 0.1145 | [0.0863; 0.1428] | < 0.0001 | 0.0010           | 0.0316 | 87.1%          |
| Omitting Moulton et al.           | 0.1677 | [0.0636; 0.2719] | 0.0016   | 0.0165           | 0.1285 | 95.4%          |
| Omitting Worsley et al.           | 0.1663 | [0.0609; 0.2716] | 0.0020   | 0.0168           | 0.1297 | 95.4%          |
| Omitting O'Neil et al.            | 0.1746 | [0.0747; 0.2744] | 0.0006   | 0.0151           | 0.1227 | 93.1%          |
| Omitting McGavock & Spratt        | 0.1664 | [0.0612; 0.2717] | 0.0019   | 0.0168           | 0.1296 | 95.4%          |

## Emotional Abuse

|                                   | PR     | 95%-CI           | p-value  | tau <sup>2</sup> | tau    | I <sup>2</sup> |
|-----------------------------------|--------|------------------|----------|------------------|--------|----------------|
| Omitting Davies, Read & Shevlin   | 0.2611 | [0.1600; 0.3621] | < 0.0001 | 0.0180           | 0.1341 | 94.6%          |
| Omitting Gracie et al.            | 0.2795 | [0.1783; 0.3808] | < 0.0001 | 0.0181           | 0.1345 | 96.4%          |
| Omitting Lagdon et al.            | 0.2818 | [0.1814; 0.3822] | < 0.0001 | 0.0177           | 0.1331 | 96.3%          |
| Omitting Martin-Denham & Donaghue | 0.2295 | [0.1776; 0.2813] | < 0.0001 | 0.0045           | 0.0668 | 93.6%          |
| Omitting Moulton et al.           | 0.2622 | [0.1616; 0.3629] | < 0.0001 | 0.0180           | 0.1342 | 96.2%          |
| Omitting Worsley et al.           | 0.2789 | [0.1769; 0.3809] | < 0.0001 | 0.0183           | 0.1352 | 96.4%          |
| Omitting O'Neil et al.            | 0.2883 | [0.1933; 0.3832] | < 0.0001 | 0.0158           | 0.1256 | 95.2%          |
| Omitting McGavock & Spratt        | 0.2799 | [0.1784; 0.3814] | < 0.0001 | 0.0181           | 0.1346 | 96.4%          |

## Sexual Abuse

|                                                | PR     | 95%-CI           | p-value | tau <sup>2</sup> | tau    | I <sup>2</sup> |
|------------------------------------------------|--------|------------------|---------|------------------|--------|----------------|
| Omitting Davies, Read & Shevlin                | 0.1130 | [0.0371; 0.1890] | 0.0035  | 0.0116           | 0.1076 | 95.4%          |
| Omitting Ireland, Alderson & Ireland           | 0.1093 | [0.0366; 0.1820] | 0.0032  | 0.0107           | 0.1032 | 97.1%          |
| Omitting Lagdon et al.,                        | 0.1343 | [0.0609; 0.2077] | 0.0003  | 0.0108           | 0.1038 | 97.4%          |
| Omitting Martin-Denham & Donaghue              | 0.0953 | [0.0415; 0.1491] | 0.0005  | 0.0057           | 0.0757 | 96.8%          |
| Omitting Moulton et al.                        | 0.1229 | [0.0447; 0.2012] | 0.0021  | 0.0124           | 0.1113 | 97.4%          |
| Omitting Oaksford & Frude                      | 0.1206 | [0.0423; 0.1989] | 0.0025  | 0.0124           | 0.1113 | 97.4%          |
| Omitting Worsley, McIntyre, Bentall & Corcoran | 0.1334 | [0.0592; 0.2077] | 0.0004  | 0.0110           | 0.1050 | 97.4%          |
| Omitting O'Neil et al.\n                       | 0.1345 | [0.0612; 0.2077] | 0.0003  | 0.0107           | 0.1035 | 97.3%          |
| Omitting McGavock & Spratt                     | 0.1297 | [0.0529; 0.2066] | 0.0009  | 0.0118           | 0.1088 | 97.5%          |

## Physical Neglect

|                                   | PR     | 95%-CI            | p-value | tau^2  | tau    | I^2   |
|-----------------------------------|--------|-------------------|---------|--------|--------|-------|
| Omitting Davies, Read & Shevlin   | 0.0837 | [ 0.0006; 0.1669] | 0.0484  | 0.0086 | 0.0927 | 93.8% |
| Omitting Gracie et al.            | 0.0995 | [ 0.0249; 0.1740] | 0.0090  | 0.0068 | 0.0826 | 96.0% |
| Omitting Martin-Denham & Donaghue | 0.0589 | [ 0.0032; 0.1146] | 0.0383  | 0.0038 | 0.0619 | 94.8% |
| Omitting Moulton et al.           | 0.0665 | [-0.0021; 0.1351] | 0.0574  | 0.0059 | 0.0768 | 95.4% |
| Omitting Worsley et al.           | 0.0981 | [ 0.0217; 0.1745] | 0.0119  | 0.0072 | 0.0848 | 95.9% |
| Omitting McGavock & Spratt        | 0.0957 | [ 0.0168; 0.1747] | 0.0175  | 0.0077 | 0.0877 | 96.3% |

## Emotional Neglect

|                                   | PR     | 95%-CI           | p-value  | tau^2  | tau    | I^2   |
|-----------------------------------|--------|------------------|----------|--------|--------|-------|
| Omitting Davies, Read & Shevlin   | 0.3043 | [0.1977; 0.4109] | < 0.0001 | 0.0110 | 0.1048 | 96.5% |
| Omitting Martin-Denham & Donaghue | 0.2494 | [0.1793; 0.3195] | < 0.0001 | 0.0046 | 0.0680 | 94.6% |
| Omitting Moulton et al.           | 0.2848 | [0.1931; 0.3764] | < 0.0001 | 0.0082 | 0.0908 | 96.9% |
| Omitting Worsley et al.           | 0.3368 | [0.2334; 0.4402] | < 0.0001 | 0.0103 | 0.1013 | 95.4% |
| Omitting McGavock & Spratt        | 0.3291 | [0.2079; 0.4502] | < 0.0001 | 0.0144 | 0.1201 | 97.2% |

## Parental Separation

|                                   | PR     | 95%-CI           | p-value  | tau^2  | tau    | I^2   |
|-----------------------------------|--------|------------------|----------|--------|--------|-------|
| Omitting Davies, Read & Shevlin   | 0.3450 | [0.1095; 0.5804] | 0.0041   | 0.0280 | 0.1672 | 96.8% |
| Omitting Martin-Denham & Donaghue | 0.2891 | [0.1684; 0.4098] | < 0.0001 | 0.0073 | 0.0857 | 96.7% |
| Omitting McGavock & Spratt        | 0.4037 | [0.2895; 0.5179] | < 0.0001 | 0.0059 | 0.0770 | 86.4% |

## Domestic Violence

|                                   | PR     | 95%-CI           | p-value  | tau^2  | tau    | I^2   |
|-----------------------------------|--------|------------------|----------|--------|--------|-------|
| Omitting Davies, Read & Shevlin   | 0.1694 | [0.0877; 0.2511] | < 0.0001 | 0.0064 | 0.0800 | 96.2% |
| Omitting Gracie et al.            | 0.1725 | [0.0800; 0.2650] | 0.0003   | 0.0085 | 0.0922 | 97.8% |
| Omitting Martin-Denham & Donaghue | 0.1620 | [0.0731; 0.2509] | 0.0004   | 0.0079 | 0.0891 | 97.8% |
| Omitting O'Neil et al.            | 0.1997 | [0.0776; 0.3218] | 0.0013   | 0.0149 | 0.1222 | 98.1% |
| Omitting McGavock & Spratt        | 0.2163 | [0.1450; 0.2876] | < 0.0001 | 0.0047 | 0.0687 | 92.9% |

## Mental health problem

|                                   | PR     | 95%-CI           | p-value  | tau^2  | tau    | I^2   |
|-----------------------------------|--------|------------------|----------|--------|--------|-------|
| Omitting Davies, Read & Shevlin   | 0.3832 | [0.2383; 0.5281] | < 0.0001 | 0.0157 | 0.1253 | 93.5% |
| Omitting Martin-Denham & Donaghue | 0.2950 | [0.2617; 0.3283] | < 0.0001 | 0.0006 | 0.0245 | 69.9% |
| Omitting O'Neil et al             | 0.3644 | [0.1995; 0.5293] | < 0.0001 | 0.0206 | 0.1434 | 95.1% |
| Omitting McGavock & Spratt        | 0.3715 | [0.2113; 0.5316] | < 0.0001 | 0.0193 | 0.1391 | 95.3% |

## Substance Use

|                                   | PR     | 95%-CI           | p-value  | tau^2  | tau    | I^2   |
|-----------------------------------|--------|------------------|----------|--------|--------|-------|
| Omitting Davies, Read & Shevlin   | 0.2232 | [0.0990; 0.3473] | 0.0004   | 0.0115 | 0.1070 | 92.0% |
| Omitting Martin-Denham & Donaghue | 0.1729 | [0.1508; 0.1949] | < 0.0001 | 0.0002 | 0.0141 | 52.2% |
| Omitting O'Neil et al             | 0.2353 | [0.1229; 0.3477] | < 0.0001 | 0.0093 | 0.0964 | 91.0% |
| Omitting McGavock & Spratt        | 0.2321 | [0.1152; 0.3490] | < 0.0001 | 0.0101 | 0.1005 | 92.1% |

## Incarceration

|                                   | PR     | 95%-CI            | p-value | tau^2  | tau    | I^2   |
|-----------------------------------|--------|-------------------|---------|--------|--------|-------|
| Omitting Davies, Read & Shevlin   | 0.0607 | [-0.0137; 0.1352] | 0.1099  | 0.0026 | 0.0510 | 89.3% |
| Omitting Martin-Denham & Donaghue | 0.0429 | [ 0.0092; 0.0766] | 0.0125  | 0.0005 | 0.0233 | 91.6% |
| Omitting McGavock & Spratt        | 0.0753 | [ 0.0361; 0.1146] | 0.0002  | 0.0006 | 0.0235 | 62.7% |
