# Supplementary material for: Exploring the prevalence of childhood adversity among university students in the United Kingdom: A systematic review and meta-analysis
Source: PubMed Central journal article supplement (PMC11356454; doi:10.1371/journal.pone.0308038), 2024-08-28

## A. Three or More ACEs and Country

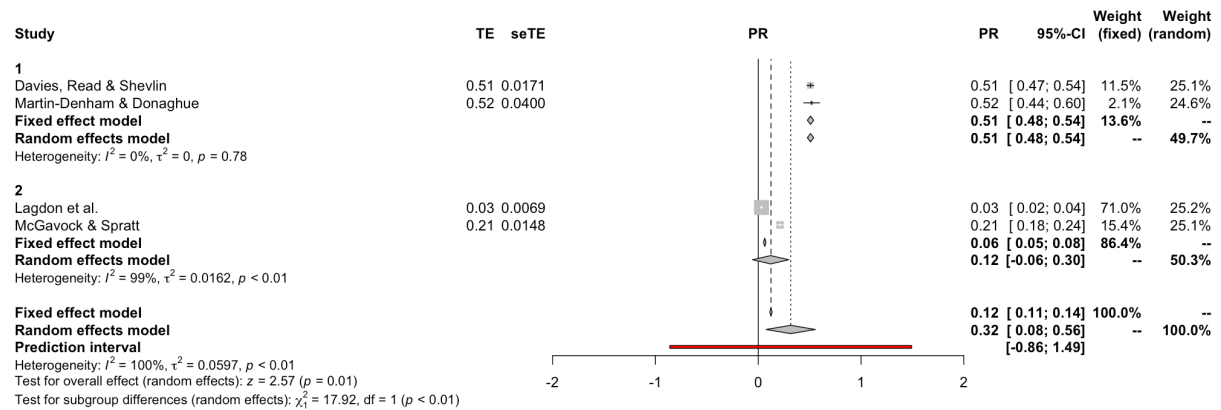

## B. Domestic Violence and Country

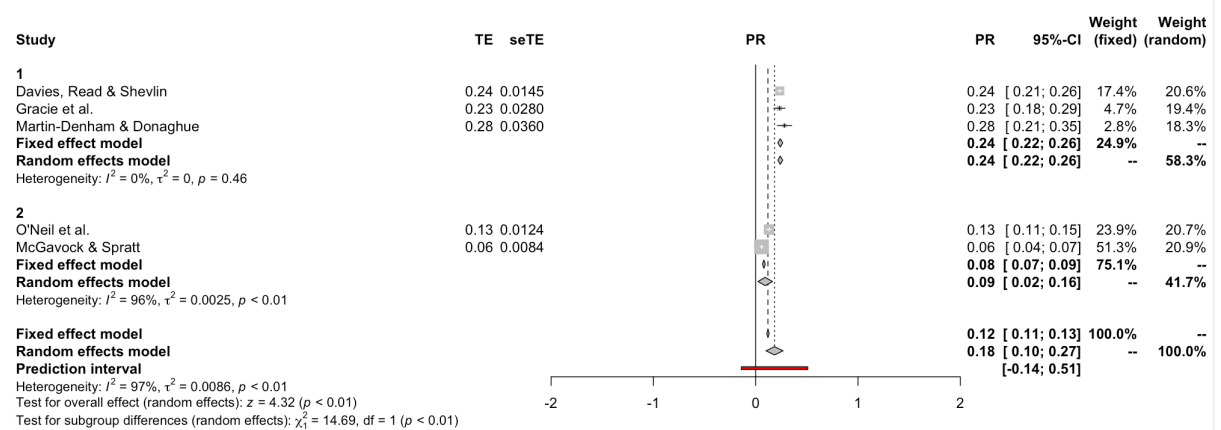

## C. Incarceration and Country

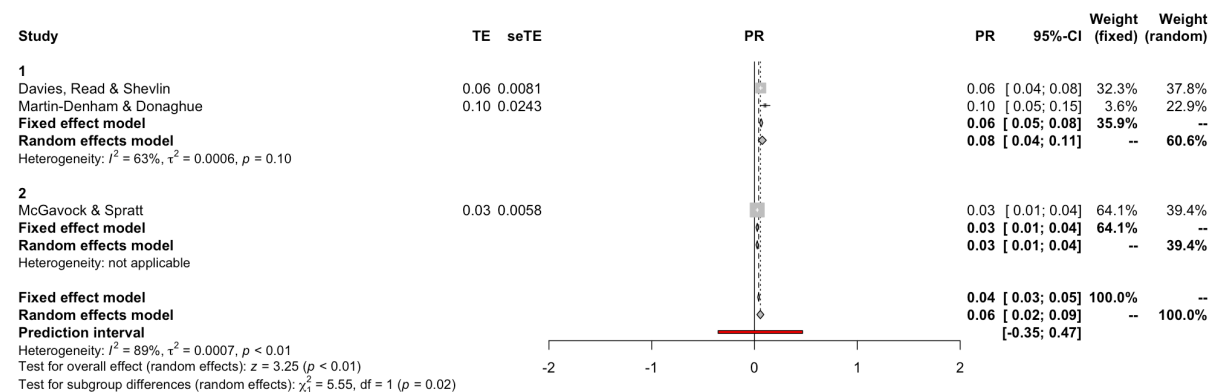

Supplement: pone.0308038.s006.pdf [file pone.0308038.s006.pdf]
