# Supplementary material for: Exploring the prevalence of childhood adversity among university students in the United Kingdom: A systematic review and meta-analysis
Source: PubMed Central journal article supplement (PMC11356454; doi:10.1371/journal.pone.0308038), 2024-08-28

## One or More ACE

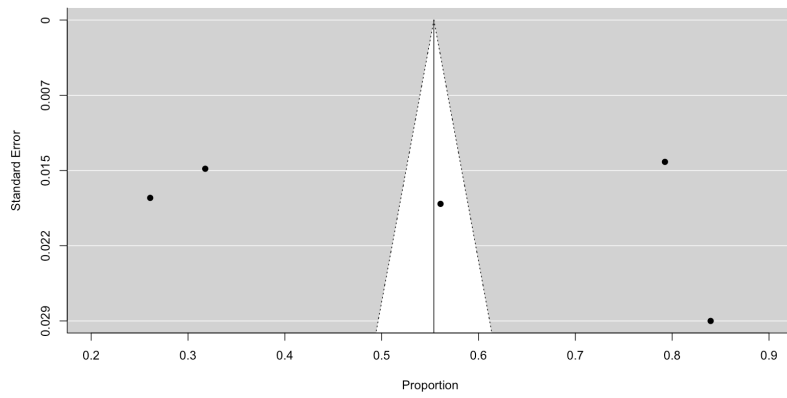

## Three or More ACEs

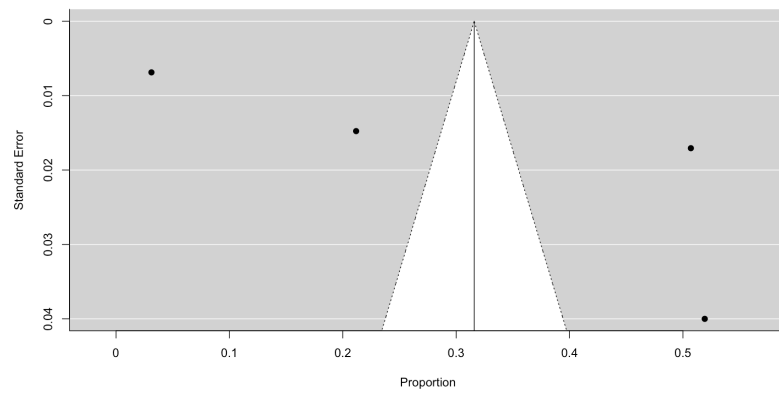

## Sexual Abuse

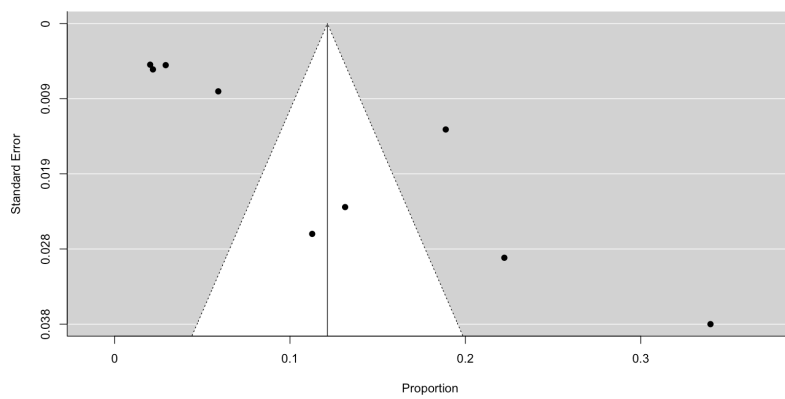

## Physical Abuse

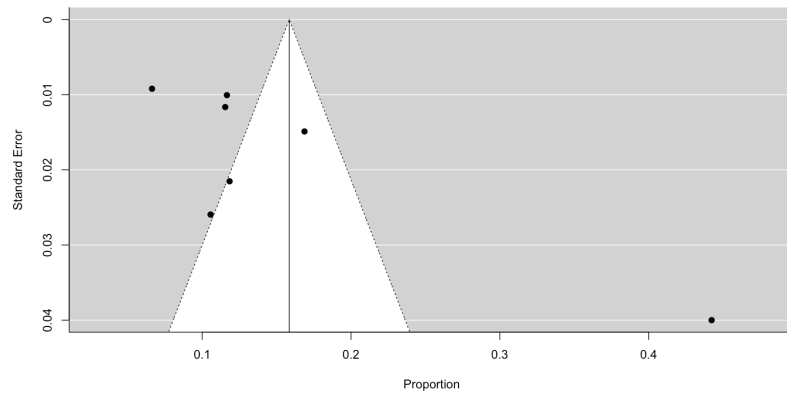

## Emotional Abuse

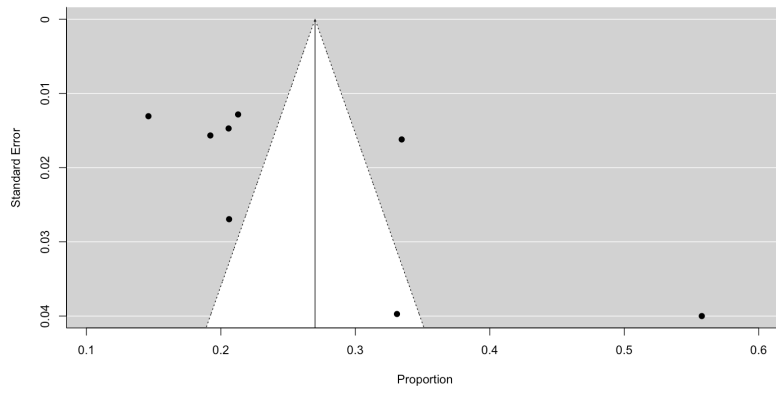

## Physical Neglect

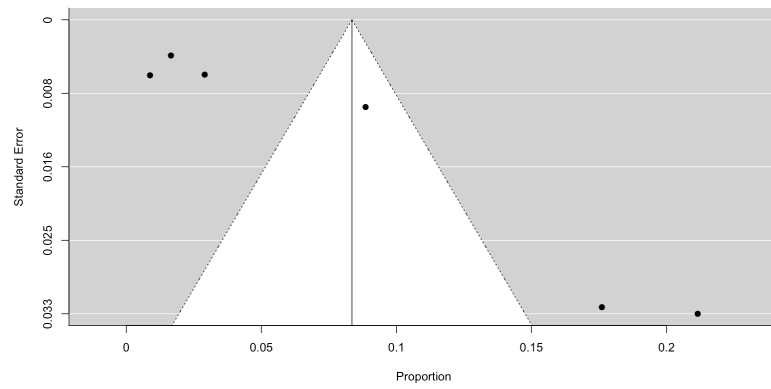

## Emotional Neglect

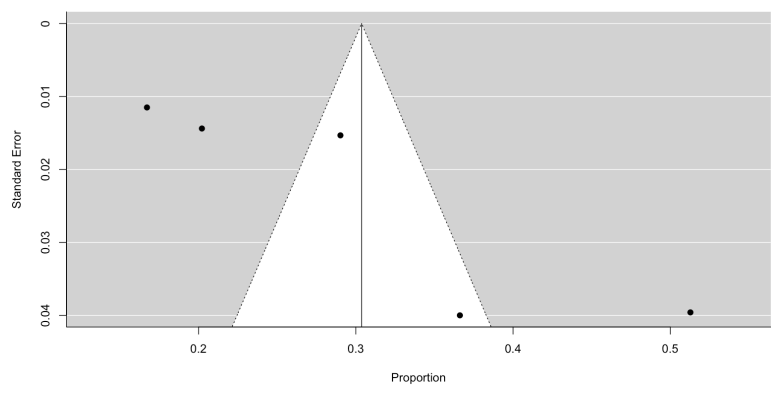

## Parental Separation

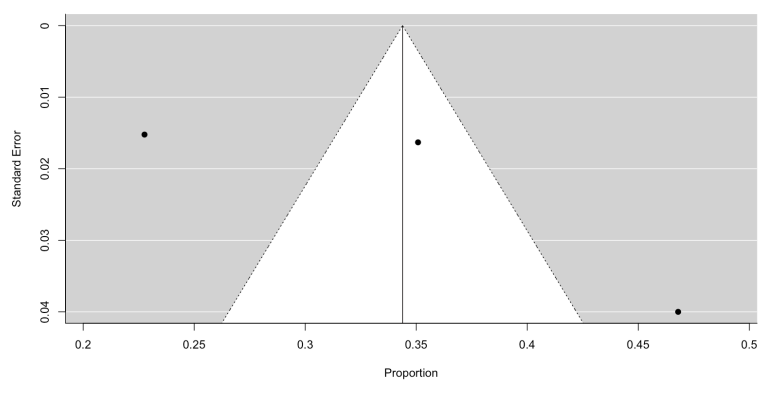

## Domestic Violence

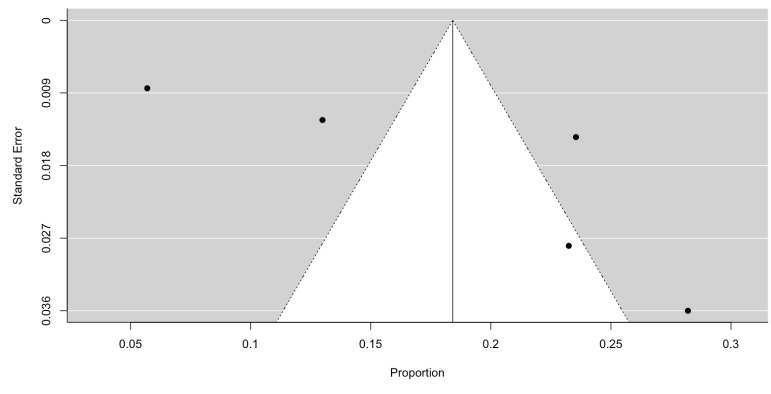

## Mental health problem

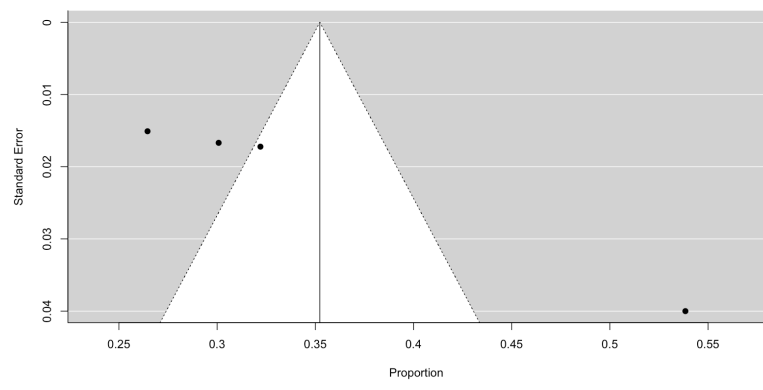

## Substance Use

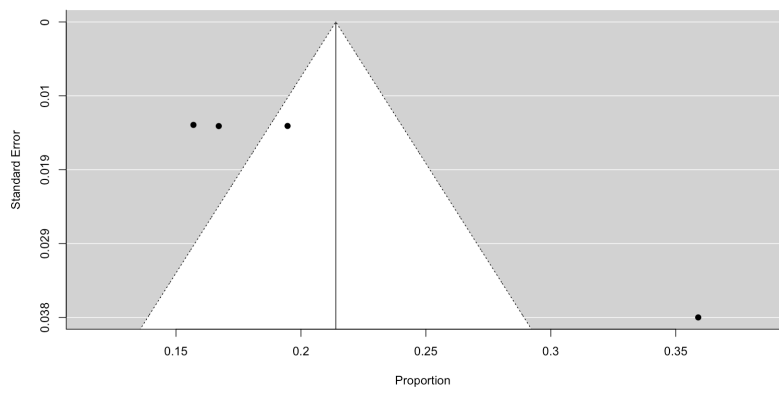

## Incarceration

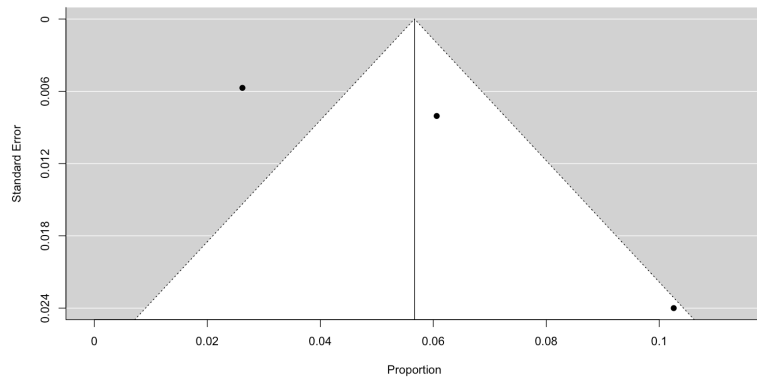

Supplement: pone.0308038.s008.pdf [file pone.0308038.s008.pdf]
