# Supplementary material for: Exploring the prevalence of childhood adversity among university students in the United Kingdom: A systematic review and meta-analysis
Source: PubMed Central journal article supplement (PMC11356454; doi:10.1371/journal.pone.0308038), 2024-08-28
Supplement: pone.0308038.s011.pdf [file pone.0308038.s011.pdf]

| Study Characteristics                                            | Prevalence % (95% CI)        |                              |                              |                              |
|------------------------------------------------------------------|------------------------------|------------------------------|------------------------------|------------------------------|
|                                                                  | SA                           | EA                           | PN                           | EN                           |
| <b>Country</b>                                                   |                              |                              |                              |                              |
| <b>England vs Northern Ireland</b>                               |                              |                              |                              |                              |
| England                                                          | <b>19.2* (6.6 – 31.7)</b>    | 32.5 (16.8 – 48.3)           | 7.7 (-1.0 – 16.5)            | 31.8 (17.7 – 45.8)           |
| Northern Ireland                                                 | <b>3.3* (0.9 – 5.7)</b>      | 18.1 (14.5 – 21.7)           | 2.9 (1.7 – 4.1)              | 20.2 (17.4 – 23.1)           |
| <b>England vs Scotland</b>                                       |                              |                              |                              |                              |
| England                                                          | 19.2 (6.6 – 31.7)            | 32.5 (16.8 – 48.3)           | 7.7 (-1.0 – 16.5)            | 31.8 (17.7 – 45.8)           |
| Scotland                                                         | 11.3 (6.1 – 16.5)            | 33.1 (25.4 – 40.8)           | 17.6 (11.3 – 23.9)           | 36.6 (28.7 – 44.5)           |
| <b>England vs Wales</b>                                          |                              |                              |                              |                              |
| England                                                          | 19.2 (6.6 – 31.7)            | N/A                          | N/A                          |                              |
| Wales                                                            | 13.2 (8.6 – 17.7)            | N/A                          | N/A                          |                              |
| <b>Northern Ireland vs Scotland</b>                              |                              |                              |                              |                              |
| Northern Ireland                                                 | <b>3.3** (0.9 – 5.7)</b>     | <b>18.1*** (14.5 – 21.7)</b> | <b>2.9*** (1.7 – 4.1)</b>    | <b>20.2*** (17.4 – 23.1)</b> |
| Scotland                                                         | <b>11.3** (6.1 – 16.5)</b>   | <b>33.1*** (25.4 – 40.8)</b> | <b>17.6*** (11.3 – 23.9)</b> | <b>36.6*** (28.7 – 44.5)</b> |
| <b>Northern Ireland vs Wales</b>                                 |                              |                              |                              |                              |
| Northern Ireland                                                 | <b>3.3*** (0.9 – 5.7)</b>    | N/A                          | N/A                          | N/A                          |
| Wales                                                            | <b>13.2*** (8.6 – 17.7)</b>  | N/A                          | N/A                          | N/A                          |
| <b>Scotland vs Wales</b>                                         |                              |                              |                              |                              |
| Scotland                                                         | 11.3 (6.1 – 16.5)            | N/A                          | N/A                          | N/A                          |
| Wales                                                            | 13.2 (8.6 – 17.7)            | N/A                          | N/A                          | N/A                          |
| <b>Measurement tool</b>                                          |                              |                              |                              |                              |
| <b>ACE vs Christoffersen et al., 2013</b>                        |                              |                              |                              |                              |
| ACE                                                              | 12.4 (0.8 – 24.0)            | 28.9 (14.8 – 42.9)           | 8.2 (-0.04 – 16.5)           | N/A                          |
| Christoffersen et al., 2013                                      | 11.3 (6.1 – 28.0)            | 33.1 (25.4 – 40.8)           | 17.6 (11.3 – 23.9)           | N/A                          |
| <b>ACE vs CASE</b>                                               |                              |                              |                              |                              |
| ACE                                                              | 12.4 (0.8 – 24.0)            | N/A                          | N/A                          | N/A                          |
| CASE                                                             | 22.2 (16.4 – 28.0)           | N/A                          | N/A                          | N/A                          |
| <b>ACE vs CTQ</b>                                                |                              |                              |                              |                              |
| ACE                                                              | 12.4 (0.8 – 24.0)            | 28.9 (14.8 – 42.9)           | N/A                          | N/A                          |
| CTQ                                                              | 2.2 (1.1 – 3.3)              | 19.2 (16.2 – 22.3)           | N/A                          | N/A                          |
| <b>ACE vs Oaksford &amp; Frude, 2001</b>                         |                              |                              |                              |                              |
| ACE                                                              | 12.4 (0.8 – 24.0)            | N/A                          | N/A                          | N/A                          |
| Oaksford & Frude, 2001                                           | 13.2 (8.6 – 17.7)            | N/A                          | N/A                          | N/A                          |
| <b>ACE vs TLEQ</b>                                               |                              |                              |                              |                              |
| ACE                                                              |                              | 28.9 (14.8 – 42.9)           | 8.2 (-0.04 – 16.5)           | N/A                          |
| TLEQ                                                             |                              | 20.6 (15.4 – 25.9)           | 0.9 (-0.3 – 2.1)             | N/A                          |
| <b>Christoffersen et al., 2013 vs CASE</b>                       |                              |                              |                              |                              |
| Christoffersen et al., 2013                                      | <b>11.3 (6.1 – 28.0)**</b>   | N/A                          | N/A                          | N/A                          |
| CASE                                                             | <b>22.2 (16.4 – 28.0)**</b>  | N/A                          | N/A                          | N/A                          |
| <b>Christoffersen et al., 2013 vs CTQ</b>                        |                              |                              |                              |                              |
| Christoffersen et al., 2013                                      | <b>11.3 (6.1 – 28.0)***</b>  | <b>33.1** (25.4 – 40.8)</b>  | N/A                          | N/A                          |
| CTQ                                                              | <b>2.2 (1.1 – 3.3)***</b>    | <b>19.2** (16.2 – 22.3)</b>  | N/A                          | N/A                          |
| <b>Christoffersen et al., 2013 vs Oaksford &amp; Frude, 2001</b> |                              |                              |                              |                              |
| Christoffersen et al., 2013                                      | 11.3 (6.1 – 28.0)            | N/A                          | N/A                          | N/A                          |
| Oaksford & Frude, 2001                                           | 13.2 (8.6 – 17.7)            | N/A                          | N/A                          | N/A                          |
| <b>Christoffersen et al., 2013 vs TLEQ</b>                       |                              |                              |                              |                              |
| Christoffersen et al., 2013                                      |                              | <b>33.1** (25.4 – 40.8)</b>  | <b>17.6*** (11.3 – 23.9)</b> | N/A                          |
| TLEQ                                                             |                              | <b>20.6** (15.4 – 25.9)</b>  | <b>0.9*** (-0.3 – 2.1)</b>   | N/A                          |
| <b>CASE vs CTQ</b>                                               |                              |                              |                              |                              |
| CASE                                                             | <b>22.2 (16.4 – 28.0)***</b> | N/A                          | N/A                          | N/A                          |
| CTQ                                                              | <b>2.2 (1.1 – 3.3)***</b>    | N/A                          | N/A                          | N/A                          |
| <b>CASE vs Oaksford &amp; Frude, 2001</b>                        |                              |                              |                              |                              |
| CASE                                                             | <b>22.2 (16.4 – 28.0)*</b>   | N/A                          | N/A                          | N/A                          |
| Oaksford & Frude, 2001                                           | <b>13.2 (8.6 – 17.7)*</b>    | N/A                          | N/A                          | N/A                          |
| <b>CTQ vs Oaksford &amp; Frude, 2001</b>                         |                              |                              |                              |                              |
| CTQ                                                              | <b>2.2 (1.1 – 3.3)***</b>    | N/A                          | N/A                          | N/A                          |
| Oaksford & Frude, 2001                                           | <b>13.2 (8.6 – 17.7)***</b>  | N/A                          | N/A                          | N/A                          |
| <b>CTQ vs TLEQ</b>                                               |                              |                              |                              |                              |
| CTQ                                                              |                              | 19.2 (16.2 – 22.3)           | N/A                          | N/A                          |
| TLEQ                                                             |                              | 20.6 (15.4 – 25.9)           | N/A                          | N/A                          |

Note. Results in bold = significant results; \* = significant at  $p < 0.05$  level; \*\* = significant at  $p < 0.01$  level; \*\*\* = significant at  $p < 0.001$  level; CI = confidence interval; SA = sexual abuse; EA = emotional abuse; PN = physical neglect; EN = emotional neglect; ACE scale = adverse childhood experiences scale; CASE = checklist to assess sexual exploitation; CTQ = childhood trauma questionnaire; TLEQ = traumatic life events questionnaire.
